1 **NormExpression: an R package**

2 **to normalize gene expression data using evaluated methods**

3  
4 Zhenfeng Wu<sup>12§</sup>, Weixiang Liu<sup>34§</sup>, Xiufeng Jin<sup>25</sup>, Deshui Yu<sup>2</sup>, Hua Wang<sup>2</sup>,  
5 Gustavo Glusman<sup>6</sup>, Max Robinson<sup>6</sup>, Lin Liu<sup>2</sup>, Jishou Ruan<sup>17\*</sup>, Shan Gao<sup>25\*</sup>  
6

7 1. School of Mathematical Sciences, Nankai University, Tianjin 300071, P.R.China.

8 2. College of Life Sciences, Nankai University, Tianjin, Tianjin 300071, P.R.China.

9 3. School of Biomedical Engineering, Health Science Center, Shenzhen University, Shenzhen 518060,  
10 P.R.China.

11 4. Guangdong Provincial Key Laboratory of Biomedical Measurements and Ultrasound Imaging, Shenzhen  
12 518060, P.R.China.

13 5. Institute of Statistics, Nankai University, Tianjin 300071, P.R.China.

14 6. Institute for Systems Biology, 401 Terry Avenue North, Seattle, Washington 98109, USA.

15 7. State Key Laboratory of Medicinal Chemical Biology, Nankai University, Tianjin 300071, P.R.China.  
16  
17  
18

19 § These authors contributed equally to this paper.

20 \* The corresponding authors.

21 SG: [gao\\_shan@mail.nankai.edu.cn](mailto:gao_shan@mail.nankai.edu.cn)

22 JR: [jsruan@nankai.edu.cn](mailto:jsruan@nankai.edu.cn)  
23

## Abstract

Data normalization is a crucial step in the gene expression analysis as it ensures the validity of its downstream analyses. Although many metrics have been designed to evaluate the current normalization methods, the different metrics yield inconsistent results. In this study, we designed a new metric named Area Under normalized CV threshold Curve (AUCVC) and applied it with another metric mSCC to evaluate 14 commonly used normalization methods, achieving consistency in our evaluation results using both bulk RNA-seq and scRNA-seq data from the same library construction protocol. This consistency has validated the underlying theory that a successful normalization method simultaneously maximizes the number of uniform genes and minimizes the correlation between the expression profiles of gene pairs. This consistency can also be used to analyze the quality of gene expression data. The gene expression data, normalization methods and evaluation metrics used in this study have been included in an R package named NormExpression. NormExpression provides a framework and a fast and simple way for researchers to evaluate methods (particularly some data-driven methods or their own methods) and then select a best one for data normalization in the gene expression analysis.

**Keyword:** gene expression; normalization; evaluation; R package; scRNA-seq

## 53 Introduction

54 Global gene expression analysis provides quantitative information about the population of RNA  
55 species in cells and tissues <sup>1</sup>. High-throughput technologies to measure global gene expression levels started  
56 with Serial Analysis of Gene Expression (SAGE) and are widely used with microarray and RNA-seq <sup>2</sup>.  
57 Recently, single-cell RNA sequencing (scRNA-seq) has been used to simultaneously measure the expression  
58 levels of genes from a single cell, providing higher resolution of cellular differences than what can be  
59 achieved by bulk RNA-seq, which can only produce an expression value for each gene by averaging its  
60 expression levels across a large population of cells <sup>3</sup>. Raw gene expression data from these high-throughput  
61 technologies must be normalized to remove technical variation so that meaningful biological comparisons  
62 can be made. Data normalization is a crucial step in the gene expression analysis as it ensures the validity of  
63 its downstream analyses <sup>1</sup>. Although the significance of gene expression data normalization has been  
64 demonstrated <sup>4</sup>, how to select a successful normalization method is still an open problem, particularly for  
65 scRNA-seq data.

66 Basically, two classes of methods are available to normalize gene expression data using global  
67 normalization factors. They are the control-based normalization and the average-bulk normalization. The  
68 former class of methods assumes the total expression level summed over a pre-specified group of genes is  
69 approximately the same across all the samples. The latter class of methods assumes most genes are not  
70 Differentially Expressed (DE) across all the samples. The control-based normalization often uses RNA from  
71 a group of internal control genes (*e.g.* housekeeping genes) or external spike-in RNA (*e.g.* ERCC RNA <sup>5</sup>),  
72 while the average-bulk normalization is more commonly used for their universality. Five average-bulk  
73 normalization methods designed to normalize bulk RNA-seq data are library size, median of the ratios of  
74 observed counts that is also referred to as the DESeq method <sup>6</sup>, Relative Log Expression (RLE),  
75 upperquartile (UQ) and Trimmed Mean of M values (TMM) <sup>7</sup>. Recently, three new methods were  
76 introduced as Total Ubiquitous (TU), Network Centrality Scaling (NCS) and Evolution Strategy (ES) with  
77 best performance among 15 tested methods <sup>8</sup>. To improve scRNA-seq data normalization, Lun et al.  
78 introduced a new method using the pooled size factors (Pooled) and claimed that their method outperformed  
79 the library size method, TMM and DESeq <sup>9</sup>. Bacher *et al.* addressed that using existing normalization  
80 methods on scRNA-seq data introduced artifacts that bias downstream analyses. Then, another new method  
81 SCnorm was introduced and claimed to outperform MR, Transcripts Per Million (TPM), scran, SCDE and  
82 BASiCS using both simulated and case study data <sup>10</sup>.

83 Although many metrics have been designed to evaluate the relative success of these methods, the  
84 different metrics yield inconsistent results. The first problem in the evaluation of normalization methods is  
85 the lack of guide by a theory. In 2013, Glusman *et al.* proposed that a successful normalization method  
86 simultaneously maximizes the number of uniform genes and minimizes the correlation between the  
87 expression profiles of gene pairs. Based on this theory, they presented two novel and mutually independent

88 metrics to evaluate 15 normalization methods and achieved consistent results using bulk RNA-seq data <sup>8</sup>. In  
 89 this study, we designed a new metric named Area Under normalized CV threshold Curve (AUCVC) and  
 90 applied it with another metric mSCC (**Materials and Methods**) to evaluate 14 commonly used  
 91 normalization methods using both bulk RNA-seq and scRNA-seq data from the same library construction  
 92 protocol. The evaluation by AUCVC and mSCC achieved consistent results using both bulk RNA-seq data  
 93 and scRNA-seq data, validating the theory proposed by Glusman *et al* <sup>8</sup>. As many new normalization  
 94 methods are developed, researchers need a fast and simple way to evaluate different methods, particularly  
 95 some data-driven methods or their own methods rather than obtain information from published evaluation  
 96 results, which could have biases or mistakes, *e.g.* misunderstanding of RLE, UQ and TMM methods <sup>11</sup>. To  
 97 satisfy this demand, we developed an R package NormExpression including the gene expression data,  
 98 normalization methods and evaluation metrics used in this study. This tool provides a framework for  
 99 researchers to select the best method for the normalization of their gene expression data based on evaluation.

## 101 Results

**A.**

$$\begin{bmatrix} x_{11} & \cdots & x_{1j} & \cdots & x_{1n} \\ \vdots & \ddots & \vdots & & \vdots \\ x_{i1} & \cdots & x_{ij} & \cdots & x_{in} \\ \vdots & & \vdots & \ddots & \vdots \\ x_{m1} & \cdots & x_{mj} & \cdots & x_{mn} \end{bmatrix} \times \begin{bmatrix} f_1 \\ \vdots \\ f_j \\ \vdots \\ f_n \end{bmatrix}$$

**B.**

$$\text{For all methods: } f_j = f_j / \exp \left[ \frac{1}{n} \sum_{j=1}^n \log(f_j) \right]$$

---


$$\text{Library size: } f_j = 10^6 / N_j^*$$

$$\text{DESeq(RLE): } f_j = 1/s_j$$

$$s_j = \exp \left[ \text{median}_i \left( \log(x_{ij}) - \frac{1}{n} \sum_{k=1}^n \log(x_{ik}) \right) \right]$$

$$\text{Upperquartile: } f_j = 10^6 / N_j s_j \quad s_j = Q_3 \left( x_{ij} / N_j \right)$$

## Basic concepts

In total, 14 normalization methods have been evaluated in this study. They are Housekeeping Genes (HG7), External RNA Control Consortium (ERCC), Total Read Number (TN), Total Read Count (TC), Cellular RNA (CR), Nuclear RNA (NR), the ratios of observed counts (DESeq), Relative Log Expression (RLE), upperquartile (UQ), Trimmed Mean of M values (TMM), Total Ubiquitous (TU), Network Centrality Scaling (NCS), Evolution Strategy (ES) and SCnorm (**Materials and Methods**). Currently, most methods with a few exceptions (*e.g.* SCnorm) are used to normalize a raw gene expression matrix ( $n$  samples by  $m$  genes) by multiplying a global normalization factor to each of its columns, yielding a normalized gene expression matrix (**Figure 1A**). The normalization factor in the package NormExpression is equivalent to the scaling factor in a previous study [8]. The reciprocal of normalization factor is the library size (**Figure 1B**), which represents total RNA in a library and is also named as size factor in the Bioconductor package DESeq<sup>6</sup>. The definition of normalization factor in NormExpression and the definition of size factor in DESeq are different from definitions of normalization factor and size factor in the Bioconductor package edgeR<sup>7</sup>. RLE, UQ and TMM in edgeR produce normalization factors to adjust library sizes, which should be used to calculate the Counts Per Million (CPM) for the normalization of gene expression data and CPM should be calculated by one million multiplying reciprocals of adjusted library sizes (**Figure 1B**). However, edgeR provides a function named calcNormFactors to produce normalization factors for library-size adjustment, which have been wrongly used for the normalization of gene expression data in many studies<sup>11</sup>. The NormExpression package includes such modifications as below. Since HG7, ERCC, TN, TC, CR, NR and TU produce normalization factors by the estimation of library sizes as CPM, their normalization factors are amplified by one million for a uniform representation (**Figure 1B**). DESeq, RLE, UQ and TMM have been modified to ignore zero values for both scRNA-seq and bulk RNA-seq data and the resulting normalization factors need be further normalized by their geometric mean values (**Figure 1B**). UQ and TMM use library sizes estimated by NR. After modification, RLE is identical to DESeq. We verified that these modifications did not change the evaluation or normalization results.

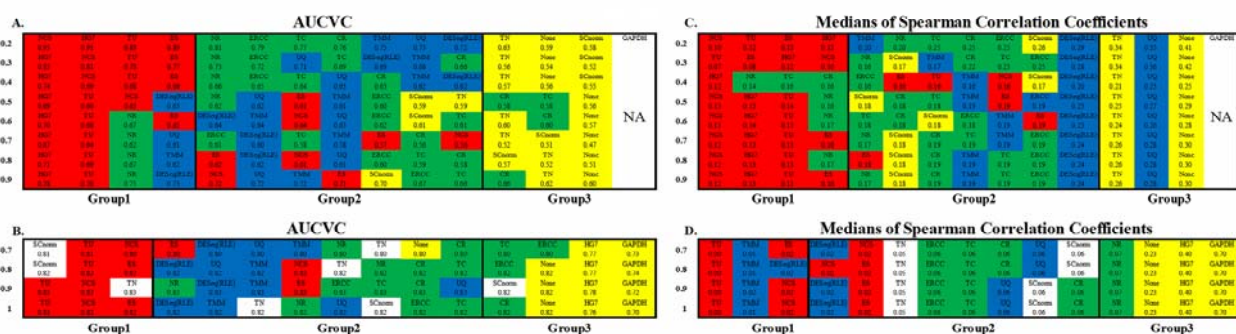

## Evaluation of 14 normalization methods

In the previous study<sup>8</sup>, Glusman *et al.* had quantified success of normalization methods by the number of uniform genes (**Materials and Methods**) and used the Coefficient of Variation (CV) cutoff 0.25 to determine the number of uniform genes for each method. This metric was designed based on the theory that

133 the relative values among different normalization methods were quite stable, although the absolute number  
134 of uniform genes depended on the cutoff value. However, it is almost impossible to determine a CV cutoff  
135 for scRNA-seq data since CV in scRNA-seq data has a much larger dynamic range than in bulk RNA-seq  
136 data.

137 Inspired by Area Under the receiver operating characteristic Curve (AUC)<sup>12</sup>, we designed a new metric  
138 named Area Under normalized CV threshold Curve (AUCVC) to evaluate 14 normalization methods using  
139 one scRNA-seq dataset scRNA663 and one bulk RNA-seq dataset bkRNA18 (**Materials and Methods**). A  
140 single housekeeping gene GAPDH was also used for comparison in the evaluation of normalization methods  
141 using bulk RNA-seq data, but it was not applicable to scRNA-seq data due to zero counts of GAPDH  
142 present in many samples. Parameter grid of non-zero ratio cutoffs (**Materials and Methods**) from 0.2 to 0.9  
143 for scRNA663 and from 0.7 to 1 for bkRNA18 was used to produce AUCVCs of all methods (**Figure 2AB**).  
144 For each non-zero ratio cutoff, the TU method used the maximum AUCVC to determine the best presence  
145 rate (**Materials and Methods**), upper and lower cutoffs by testing all possible combinations of presence rate,  
146 lower and upper cutoffs at 5% resolution. The presence rate cutoff was tested from 0.2 to 0.6 for scRNA663  
147 and set to 1 for bkRNA18. The lower cutoff was tested from 5% to 40% and the upper cutoff was tested  
148 from 60% to 95%. In addition, the calculation only considered each combination of lower and upper cutoffs  
149 which produced more than 1,00 ubiquitous genes (**Materials and Methods**) for scRNA663 and more than  
150 1,000 for bkRNA18. For each non-zero ratio cutoff, NCS and ES used the presence rate, lower and upper  
151 cutoffs determined by the TU method, when it achieved the maximum AUCVC. The raw gene expression  
152 matrix (None) was also used to produce AUCVCs for comparison.

153 The evaluation results using both scRNA663 and bkRNA18 showed that all methods except HG7, TN  
154 and SCnorm were classified into three groups based on their AUCVC values sorted in descending order  
155 (**Figure 2AB**). The first group including TU, NCS and ES achieved the best performances using both  
156 scRNA663 and bkRNA18. TU, NCS and ES, which had only been evaluated using bulk RNA-seq data in  
157 the previous study<sup>8</sup>, were evaluated by our new metric AUCVC as the best normalization methods using  
158 both scRNA-seq and bulk RNA-seq data. The second group including ERCC, TC, CR, NR, DESeq, RLE,  
159 UQ and TMM achieved medial performances using both scRNA663 and bkRNA18. In the second group,  
160 ERCC, TC, CR and NR outperformed DESeq, RLE, UQ and TMM using scRNA663, while DESeq, RLE,  
161 UQ and TMM outperformed ERCC, TC, CR and NR using bkRNA18. The third group achieved the poorest  
162 performances, including TN, SCnorm and None for scRNA663 (**Figure 2A**) and HG7, GAPDH and None  
163 for bkRNA18 (**Figure 2B**). HG7 and GAPDH achieved the poorest performances using bkRNA18,  
164 suggesting that a predefined set of housekeeping genes may not be appropriate guides for data normalization  
165 of bulk RNA-seq data. However, it could be coincidental that HG7 was classified into the first group using  
166 scRNA663. TN outperformed the second group of methods using bkRNA18 but underperformed it using  
167 scRNA663. SCnorm was designed to improve the scRNA-seq data normalization but it performed better  
168 using scRNA-seq data than bulk RNA-seq data. Particularly, SCnorm ranked the first in the best group by its



169 AUCVC to normalize bkRNA18 when the non-zero ratio cutoffs were set to 0.7 or 0.8 (**Figure 2B**), but  
 170 ranked the last in the poorest group to normalize scRNA663 when the non-zero ratio cutoffs were set to 0.2  
 171 to 0.4 (**Figure 2A**).

172 The evaluation results by the medians of Spearman Correlation Coefficients between the normalized  
 173 expression profiles of ubiquitous gene pairs (mSCCs) (**Materials and Methods**) were consistent with the  
 174 evaluation results by AUCVC (**Figure 2**). This validated the underlying theory that a successful  
 175 normalization method simultaneously maximizes the number of uniform genes and minimizes the  
 176 correlation between the expression profiles of gene pairs. Then, we calculated Spearman Correlation  
 177 Coefficients (SCCs) between all the normalization factors except that using SCnorm. Using 1- SCCs as  
 178 distances, hierarchical clustering of 13 normalization factors showed equivalent classification into the same  
 179 groups (**Figure 3EF**) as those (**Figure 2AB**) by AUCVC. The evaluation results by AUCVC, mSCC and  
 180 hierarchical clustering can be visualized using NormExpression. From Figure 3, it can be seen that, while  
 181 normalization methods except HG7, GAPDH and None perform without much differences on bulk RNA-seq  
 182 data (**Figure 3BDF**), they have significant differences in the performances on scRNA-seq data (**Figure**  
 183 **3ACE**). This provides an explanation as to why bulk RNA-seq data and scRNA-seq data from the same  
 184 samples produced different results in many biological studies. Therefore, it is more challenging to select a  
 185 best method for the normalization of scRNA-seq data.

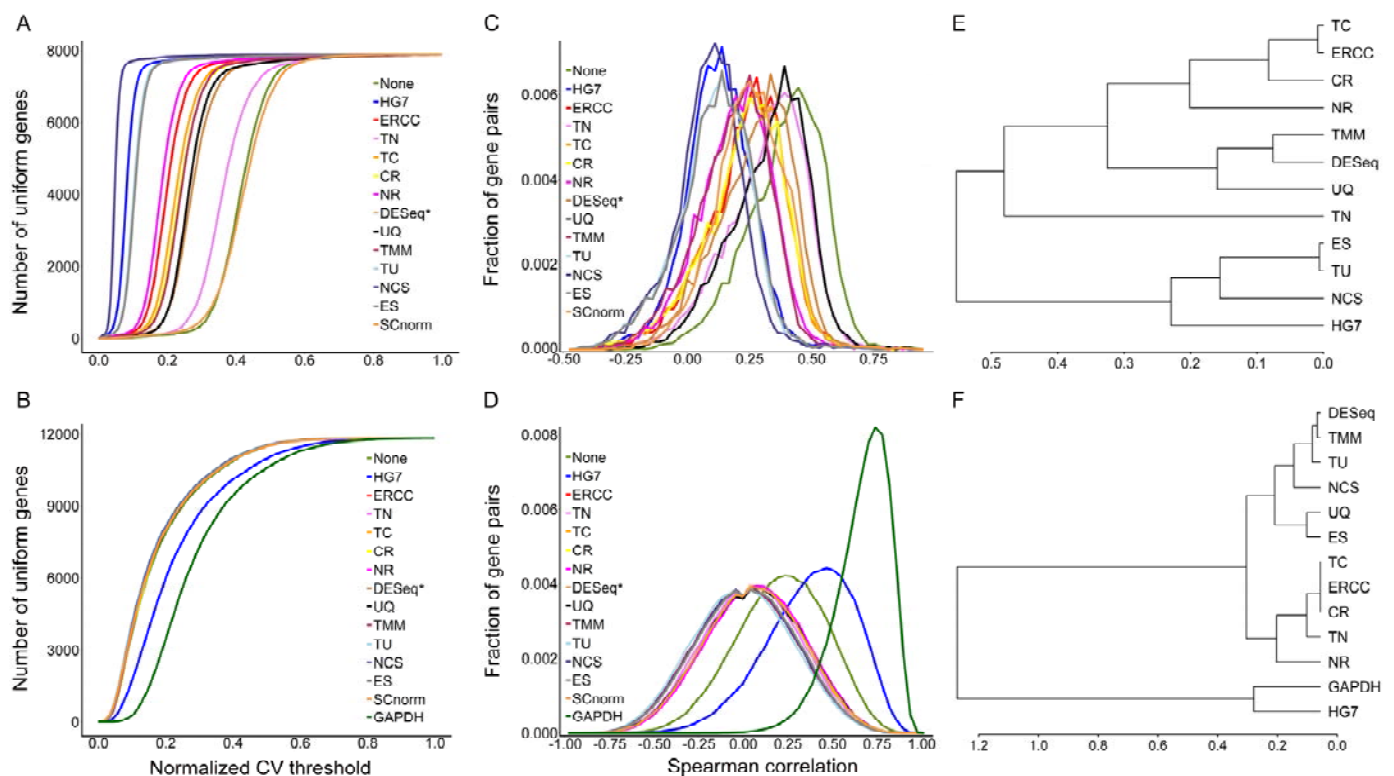

186  
 187 **Implementation and availability**

188 The gene expression data (scRNA663 and bkRNA18), normalization methods (except NCS, ES and  
 189 SCnorm) and evaluation metrics (AUCVC and mSCC) have been included in the R package  
 190 NormExpression. The data process in this study was provided in detail (**Supplementary file 1**). All the

191 functions except the NCS and ES methods have been implemented in R programs for their running on R  
192 platforms of any version. The NCS and ES methods had been implemented in Perl programs with multiple  
193 dependencies on Perl modules <sup>8</sup> and were modified into a stand-alone program for Linux systems  
194 (**Supplementary file 2**).

195 NormExpression can be used in three ways: normalization without evaluation, normalization with  
196 simple evaluation or normalization with complete evaluation. Normalization without evaluation is suggested  
197 to use TU for users' data, since it has been already ranked as the best method for both scRNA-seq and bulk  
198 RNA-seq data (**Supplementary file 1**). Normalization with simple evaluation by AUCVC is suggested to  
199 select the best method from 10 normalization methods using users' data, which are HG7, ERCC (if  
200 available), TN, TC, CR, NR, DESeq (RLE), UQ and TMM. The raw gene expression matrix is also used to  
201 produce AUCVCs for comparison. TN, NCS, ES and SCnorm are not included in 10 methods, since TN and  
202 SCnorm have not shown robust performances, and NCS and ES have a similar performance of TU but are  
203 much more time consuming. Normalization with complete evaluation by AUCVC and mSCC for method  
204 selection is suggested to select the best method from at least 10 normalization methods plus TU. The  
205 normalization with simple evaluation determines the best method based on its AUCVC, while normalization  
206 with complete evaluation need consider the consistency of results using two metrics (**Materials and**  
207 **Methods**).

## 209 **Materials and Methods**

### 210 **Datasets**

211 In a previous study by Lin Liu *et al.* (SRA: SRP113436), 663 single-cell samples and 18 bulk samples  
212 had been sequenced using the Smart-seq2 scRNA-seq protocol. In this study, we built a scRNA-seq dataset  
213 including 653 single cells from colon tumor tissues and 10 single cells from distal tissues (>10 cm) as  
214 control. We also built a bulk RNA-seq dataset including nine samples from colon tumor tissues and nine  
215 samples from distal tissues. The cleaning and quality control of both scRNA-seq and bulk RNA-seq data  
216 were performed using the pipeline Fastq\_clean [15] that was optimized to clean the raw reads from Illumina  
217 platforms. Using the software STAR <sup>13</sup> v2.5.2b, we aligned all the cleaned scRNA-seq and bulk RNA-seq  
218 reads to the human genome GRCh38/hg38 and quantified the expression levels of 57,992 annotated genes  
219 (57,955 nuclear and 37 mitochondrial). Non-polyA RNAs were not discarded to test the robustness of  
220 normalization methods, although the Smart-seq2 protocol theoretically had only captured polyA RNAs. In  
221 addition, the expression levels of 92 ERCC RNAs and the long non-coding RNA (lncRNA) MDL1 in the  
222 human mitochondrion <sup>14</sup> were also quantified. ERCC RNA had been spiked into 208 single-cell samples  
223 before library construction; the expression levels of 92 ERCC RNAs in other 455 single-cell samples and 18  
224 bulk samples were simulated by linear regression. Finally, the two datasets were named scRNA663 (58085  
225 × 663) and bkRNA18 (58085 × 18), and were included into the R package NormExpression.



226

## 227 **Normalization methods**

228 HG7, ERCC, TN, TC, CR, NR and TU are based on a set of pre-selected genes and each of these  
229 methods uses the gene expression level summed over these pre-selected genes in a sample as the library size  
230 (**Figure 1B**) to calculate the normalization factor. The pre-selected genes used by HG7, ERCC and TU are  
231 seven housekeeping genes, 92 ERCC RNAs and ubiquitous genes (described below), respectively. Seven  
232 genes (UBC, HMBS, TBP, GAPDH, HPRT1, RPL13A and ACTB) in the HG7 method had been used to  
233 achieve the best evaluation result among those using all possible combinations of tested housekeeping genes  
234 in the previous study by Glusman *et al.* <sup>8</sup>. ERCC RNA is a set of commonly used spike-in RNA consisting  
235 of 92 polyadenylated transcripts with short 3' polyA tails but without 5' caps <sup>5</sup>. NR only counts reads which  
236 have been aligned to nuclear genomes, while CR counts reads which have been aligned to both nuclear and  
237 mitochondrial genomes. The library size estimated by TC is equal to the estimations by CR and ERCC  
238 combined. TN uses the number of all reads which can be aligned to 92 ERCC RNAs, nuclear and  
239 mitochondrial genomes.

240 The DESeq method was obtained from the Bioconductor package DESeq <sup>6</sup> and modified to process  
241 scRNA-seq data. RLE, UQ and TMM were obtained from the Bioconductor package edgeR <sup>7</sup> and modified  
242 to process scRNA-seq data. TU, NCS and ES were obtained from the previous study by Glusman *et al.* <sup>8</sup>.  
243 Since TU sums counts of all ubiquitous genes as the library size to calculate the normalization factor, a  
244 process to identify ubiquitous genes (described below) has been integrated into the TU method: our  
245 implementation of TU maximizes AUCVC instead of the number of resulting uniform genes to determine  
246 the best presence rate, upper and lower cutoffs in the R package NormExpression. SCnorm was obtained  
247 from the Bioconductor package SCnorm <sup>10</sup>.

248

## 249 **Uniform genes and ubiquitous genes**

250 A gene was defined as uniform when the Coefficient of Variation (CV, **Formula 1**) of its post-  
251 normalization expression levels across all samples was not more than a cutoff. Ubiquitous genes were  
252 defined as the intersection of a trimmed sets of all samples <sup>8</sup>. This trimmed set of genes were selected for  
253 each sample by 1) excluding genes with zero values, 2) sorting the non-zero genes by expression level in  
254 that sample, and 3) removing the upper and lower ends of the sample-specific expression distribution.  
255 Glusman *et al.* determined the best upper and lower cutoffs by testing all possible combinations of lower and  
256 upper cutoffs at 5% resolution to maximize the number of resulting uniform genes using one bulk RNA-seq  
257 dataset <sup>8</sup>. The size of a scRNA-seq dataset is usually very large, which could result in a very small or even  
258 empty set of ubiquitous genes, since the number of ubiquitous genes depends on the sizes of datasets. To  
259 identify ubiquitous genes using scRNA-seq data, we defined a new parameter named presence rate,  
260 governing the minimal fraction of trimmed sets in which a gene must appear to be considered ubiquitous.

261

## Evaluation metrics

In the previous study<sup>8</sup>, Glusman *et al.* designed two novel and mutually independent metrics, which were the number of uniform genes and Spearman Correlation Coefficients (SCCs) between expression profiles of gene pairs. The basic theory underlying these two evaluation metrics is that a successful normalization method simultaneously maximizes the number of uniform genes and minimizes the correlation between the expression profiles of gene pairs. In this study, we designed a new metric AUCVC instead of the number of uniform genes for method evaluation. In addition, we randomly selected 1,000,000 ubiquitous gene pairs to calculate the mSCCs for method evaluation (**Figure 3CD**). Then, we compared the evaluation results by mSCC with those by AUCVC to assess the consistency.

AUCVC (**Figure 3AB**) is created by plotting the number of uniform genes (y-axis) at each normalized CV (**Formula 2**) cutoff (x-axis). To determine the number of uniform genes using scRNA-seq data containing a high frequency of zeros, we only considered genes with non-zero ratios not less than a cutoff. The parameter non-zero ratio of one gene should be calculated as the number of its all non-zero expression values divided by the number of total samples. Since a high or a low normalized CV cutoff produces more false or less uniform genes, it is reasonable to consider the overall performance of each method at various cutoff settings instead of that at one specific cutoff setting. In Formula 1 and 2, symbols have the same meanings as those in Figure 1 and  $n^*$  does not count zero elements in each sample.

$$CV_i = \left( \sqrt{\frac{1}{n} \sum_{j=1}^n (x_{ij} - \bar{x}_i)^2} \right) / \bar{x}_i, \quad \bar{x}_i = \frac{1}{n} \sum_{j=1}^n x_{ij} \quad (1)$$

$$\text{Normalized } CV_i = \left\{ CV_i - \min_i(CV_i) \right\} / \left\{ \max_i(CV_i) - \min_i(CV_i) \right\}$$
$$CV_i = \left( \sqrt{\frac{1}{n^*} \sum_{j=1}^{n^*} (\log_2(x_{ij}) - \bar{x}_i)^2} \right) / \bar{x}_i, \quad \bar{x}_i = \frac{1}{n^*} \sum_{j=1}^{n^*} \log_2(x_{ij}), \quad x_{ij} > 0 \quad (2)$$

## Acknowledgments

We thank Professor Sui Huang and Dr. Joseph Zhou from Institute for Systems Biology (ISB) their hosts on Shan Gao' visiting to ISB.

## Funding

This work was supported by grants from by National Key Research and Development Program of China (2016YFC0502304-03) to Defu Chen, National Natural Science Foundation of China (NSFC)

291 (11701296) to Jianzhao Gao and Fundamental Research Funds for the Central Universities (for Nankai  
292 University) to Shan Gao.

## 293 294 **Competing interests**

295 No financial competing interests are claimed in this study.

## 296 297 **Authors' contributions**

298 SG conceived this project. SG and JR supervised this project. ZW, WL and XJ performed programing.  
299 ZW and DY analyzed the data. HW prepared all the figures, tables and additional files. SG drafted the main  
300 manuscript. LL, GG and MR revised the manuscript. **All authors have read and approved the manuscript.**

## 301 302 303 **REFERENCES**

- 304
- 305 1 Lovén, J. *et al.* Revisiting global gene expression analysis. *Cell* **151**, 476-482 (2012).
- 306 2 Gao, S., Ou, J. & Xiao, K. *R language and Bioconductor in bioinformatics applications(Chinese*  
307 *Edition)*. (Tianjin Science and Technology Translation Publishing Ltd, 2014).
- 308 3 Gao, S. Data Analysis in Single-Cell Transcriptome Sequencing. *Methods Mol Biol* **1754**, 18 (2018).
- 309 4 Bullard, J. H., Purdom, E., Hansen, K. D. & Dudoit, S. Evaluation of statistical methods for  
310 normalization and differential expression in mRNA-Seq experiments. *Bmc Bioinformatics* **11**, 94,  
311 doi:10.1186/1471-2105-11-94 (2010).
- 312 5 Jiang, L. *et al.* Synthetic spike-in standards for RNA-seq experiments. *Genome Res* **21**, 1543 (2011).
- 313 6 Anders, S. & Huber, W. Differential expression analysis for sequence count data. *Genome Biol* **11**,  
314 R106 (2010).
- 315 7 Robinson, M. D., McCarthy, D. J. & Smyth, G. K. edgeR: a Bioconductor package for differential  
316 expression analysis of digital gene expression data. *Bioinformatics* **26**, 139-140 (2010).
- 317 8 Glusman, G., Caballero, J., Robinson, M., Kutlu, B. & Hood, L. Optimal scaling of digital  
318 transcriptomes. *Plos One* **8**, e77885 (2013).
- 319 9 L., L. A. T., Karsten, B. & Marioni, J. C. Pooling across cells to normalize single-cell RNA  
320 sequencing data with many zero counts. *Genome Biol* **17**, 75 (2016).
- 321 10 Bacher, R. *et al.* SCnorm: robust normalization of single-cell RNA-seq data. *Nat Methods* **14**, 584  
322 (2017).
- 323 11 Li, P., Piao, Y., Shon, H. S. & Ryu, K. H. Comparing the normalization methods for the differential  
324 analysis of Illumina high-throughput RNA-Seq data. *Bmc Bioinformatics* **16**, 347 (2015).
- 325 12 Gao, S. *et al.* Prediction of function changes associated with single-point protein mutations using  
326 support vector machines (SVMs). *Hum Mutat* **30**, 1161-1166, doi:10.1002/humu.21039 (2009).
- 327 13 Dobin, A. *et al.* STAR: ultrafast universal RNA-seq aligner. *Bioinformatics* **29**, 15-21 (2013).
- 328 14 Gao, S. *et al.* Two novel lncRNAs discovered in human mitochondrial DNA using PacBio full-  
329 length transcriptome data. *Mitochondrion* (2017).
- 330

## 331 **Figure legends**

332 **Figure 1. Basic concepts**

333 (A). A raw gene expression matrix can be transformed into a normalized gene expression matrix by the  
334 multiplication of a global factor  $f_j$  to each column. Each column represents the expression levels of all genes  
335 from a sample and each row represents the expression levels of a gene across all samples. (B). HG7, ERCC,  
336 TN, TC, CR, NR and TU use  $N_j^*$  as library sizes to calculate normalization factors.  $N_j$  represents the library  
337 size estimated by TC. DESeq, RLE, UQ and TMM have been modified in NormExpression to ignore zero  
338 values and the resulting normalization factors need be further normalized by their geometric mean values.  
339 After modification, RLE is identical to DESeq. Q3 means that about 75% of genes in the  $j$ th sample have  
340 expression levels below Q3 and about 25% have those above Q3. For all methods, log represents the natural  
341 logarithm.

## 342 **Figure 2. Grid of non-zero ratio to evaluate normalization methods**

343  
344  
345 Grid of non-zero ratio cutoffs from 0.2 to 0.9 for scRNA663 and from 0.7 to 1 for bkRNA18 was used to  
346 produce AUCVCs All the normalization methods were classified into three groups based on their AUCVC  
347 values sorted in descending order using one scRNA-seq dataset scRNA663 (A) and one bulk RNA-seq  
348 dataset bkRNA18 (B). These methods were also classified into three groups based on their medians of SCCs  
349 sorted in ascending order using one scRNA-seq dataset scRNA663 (C) and one bulk RNA-seq dataset  
350 bkRNA18 (D). GAPDH is not applicable to scRNA-seq data due to zero counts of GAPDH present in many  
351 samples. All the numbers are accurate to two decimal places, the marginal differences are reflected by their  
352 orders.

## 353 354 **Figure 3. Consistency in evaluation results by different metrics**

355  
356 A normalization method with a higher AUCVC produced a lower median of Spearman Correlation  
357 Coefficients (SCCs) between the normalized expression profiles of ubiquitous gene pairs using both scRNA-  
358 seq (AC) and bulk RNA-seq data (BD). Using 1- SCCs as distances, hierarchical clustering of 13 methods  
359 showed equivalent classification into the same groups (EF) as those (Figure 2AB) by AUCVC. SCCs were  
360 calculated between normalization factor pairs of 13 methods. SCnorm was not applicable to be used to  
361 calculate SCCs, since it produced a factor matrix rather than a factor vector as 13 other methods.
